RESEARCH ARTICLE

# Oxidative and glycolytic skeletal muscles show marked differences in gene expression profile in Chinese Qingyuan partridge chickens

Shu Jingting<sup>☉</sup>, Xiao Qin<sup>☉</sup>, Shan Yanju, Zhang Ming, Tu Yunjie, Ji Gaige, Sheng Zhongwei, Zou Jianmin\*

Key laboratory for poultry genetics and breeding of Jiangsu province, Institute of Poultry Science, Chinese Academy of Agricultural Science, Yangzhou, Jiangsu, China

☉ These authors contributed equally to this work.

\* [jqszm@163.com](mailto:jqszm@163.com)

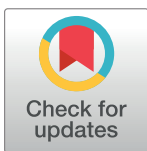

**OPEN ACCESS**

**Citation:** Jingting S, Qin X, Yanju S, Ming Z, Yunjie T, Gaige J, et al. (2017) Oxidative and glycolytic skeletal muscles show marked differences in gene expression profile in Chinese Qingyuan partridge chickens. PLoS ONE 12(8): e0183118. <https://doi.org/10.1371/journal.pone.0183118>

**Editor:** Shao Jun Du, University of Maryland Center for Environmental Science, UNITED STATES

**Received:** May 3, 2017

**Accepted:** July 28, 2017

**Published:** August 16, 2017

**Copyright:** © 2017 Jingting et al. This is an open access article distributed under the terms of the [Creative Commons Attribution License](https://creativecommons.org/licenses/by/4.0/), which permits unrestricted use, distribution, and reproduction in any medium, provided the original author and source are credited.

**Data Availability Statement:** NCBI's Gene Expression Omnibus under series accession number GSE69918.

**Funding:** Research supported by the National Natural Science Foundation of China (31301967,31572358), the Earmarked Fund for Modern Agro-Industry Technology Research System (CARS-42-G03), the Special Fund for Independent Innovation of Agricultural Science and Technology in Jiangsu Province of China (CX(15)

## Abstract

Oxidative and glycolytic myofibers have different structures and metabolic characteristics and their ratios are important in determining poultry meat quality. However, the molecular mechanisms underlying their differences are unclear. In this study, global gene expression profiling was conducted in oxidative skeletal muscle (obtained from the *soleus*, or SOL) and glycolytic skeletal muscle (obtained from the *extensor digitorum longus*, or EDL) of Chinese Qingyuan partridge chickens, using the Agilent Chicken Gene Expression Chip. A total of 1224 genes with at least 2-fold differences were identified ( $P < 0.05$ ), of which 654 were upregulated and 570 were downregulated in SOL. GO, KEGG pathway, and co-expressed gene network analyses suggested that *PRKAG3*, *ATP2A2*, and *PPARGC1A* might play important roles in myofiber composition. The function of *PPARGC1A* gene was further validated. *PPARGC1A* mRNA expression levels were higher in SOL than in EDL muscles throughout the early postnatal development stages. In myoblast cells, shRNA knockdown of *PPARGC1A* significantly inhibited some muscle development and transition-related genes, including *PPP3CA*, *MEF2C*, and *SM* ( $P < 0.01$  or  $P < 0.05$ ), and significantly upregulated the expression of *FWM* ( $P < 0.05$ ). Our study demonstrates strong transcriptome differences between oxidative and glycolytic myofibers, and the results suggest that *PPARGC1A* is a key gene involved in chicken myofiber composition and transition.

## Introduction

The Qingyuan partridge chicken is an important indigenous breed in China, and is popular for its superior meat quality [1]. It is a light-body type breed, which is famous for its three “yellow”, two “thin” and one “partridge” morphology features, i.e. yellow beak, shanks and skin; thin head and bone; partridge feather. This breed has high oxidative metabolism leading to desirable traits in muscles, such as higher red muscle ratio, favourable meat colour, marbling, and flavour [2].

1009) and Natural Science Foundation of Jiangsu Province (BE2015344, BK20161322).

**Competing interests:** The authors declare that they have no competing interests.

**Abbreviations:** ATP2A2, ATPase, Ca<sup>2+</sup> transporting, cardiac muscle, slow twitch 2; CHRNA1, cholinergic receptor, nicotinic, alpha 1 (muscle); COL2A1, collagen, type II, alpha 1; EDL, *extensor digitorum longus*; FASN, fatty acid synthase; FWM, fast myosin heavy chain; HOXD11, homeobox D11; IMF, intramuscular fat; MEF2C, myocyte enhancer factor 2C; MYH1E, fast myosin heavy chain; NFATC3, nuclear factor of activated T-cells, cytoplasmic calcineurin-dependent 3; PPARGC1A, peroxisome proliferator-activated receptor gamma coactivator 1-alpha; PPARGC1B, peroxisome proliferator-activated receptor gamma coactivator 1 beta; PPP2CA, protein phosphatase 2, catalytic subunit, alpha isozyme; PPP3CA, protein phosphatase 3, catalytic subunit; PPP3R1, protein phosphatase 3, regulatory subunit B; PRKAG3, protein kinase, AMP-activated, gamma 3 non-catalytic subunit; SCD5, stearoyl-CoA desaturase 5; SM, slow myosin heavy chain; SOL, *soleus*; TNNC1, troponin C type 1 (slow); TNNI2, troponin I type 2 (skeletal, fast).

Research in recent years has led to remarkable progress in various aspects of poultry breeding, including growth rate, meat yield, and body composition traits, but some meat quality traits such as intramuscular fat (IMF) content, tenderness, water-holding capacity, and colour have been negatively affected [3]. Meat quality is a complex trait and is influenced by many factors, making it difficult to predict and improve [4]. Skeletal muscle, the main tissue determining meat quality and production in chickens, is a heterogeneous tissue composed of different fiber types, varying in their morphology, metabolism, and physiology [5, 6]. Previous studies have found that different myofiber types can influence meat quality [7, 8]. In chickens, myofibers can be divided into oxidative (type I and IIa, red) and glycolytic (type IIb, white). In the chicken, the *soleus* is an oxidative muscle with numerous capillaries and high lipid, myoglobin, and mitochondria content, while the *extensor digitorum longus* and lateral *gastrocnemius* are glycolytic muscles exhibiting fewer capillaries and lower lipids myoglobin, and mitochondria content [9]. A higher content of oxidative (red) fibers in muscles can result in higher meat quality, and there may be a large number of genes taking part in the determination of meat quality [10, 11]. Therefore, it is important to understand the molecular processes that govern the specific myofiber type expression and the phenotypic characteristics of skeletal muscle in the genetic improvement of chicken meat quality.

Microarray technology can identify a large number of differentially expressed genes in a given tissue simultaneously and has been conducted to compare gene expression profiles responsible for relevant phenotypes in animals [12–16]. Previous studies have been compared differences in gene expression between oxidative and glycolytic muscles in various species. Campbell et al. (2001) used Affymetrix Mu11K SubB to discover differentially expressed genes between the white *quadratus lumborum* and the red *soleus* muscle of female mice, and identified 49 differentially expressed genes [17]. Bai et al. (2003) found many candidate genes, which determine muscle red/white phenotype in Berkshire pigs [18]. Li et al. (2010) found 28 signalling pathways, including MAPK and Wnt pathways, which responded to metabolic differences between muscle types in Meishan pigs using Affymetrix Porcine Genechip [19]. Zhu et al. (2015) revealed 561 differentially expressed genes between *extensor digitorum longus* and *soleus* muscles of large white pigs by RNA-seq technology, and identified many muscle-related genes and pathways related to myofiber formation [20]. Zhang et al. (2015) revealed 168 DEGs between leg muscle (LM) and pectoral muscle (PM) in ducks [21]. However, in chickens, the comparison of global gene expression patterns between muscle fiber types are lacking. Only one report has compared the differences between broiler and layer skeletal muscle cells [22]. In the present study, global differentially expressed genes between oxidative (*soleus*) and glycolytic (*extensor digitorum longus*) muscle of Qingyuan partridge chickens were investigated using the Agilent Chicken Gene Expression Chip (4×44K, Design ID: 026441). The candidate gene *PPARGC1A* was selected for further investigation of its potential involvement in chicken myofiber composition. We aimed to investigate the distinct properties between oxidative and glycolytic myofibers, and we expect that it will provide useful information in improving and controlling chicken meat quality.

## Materials and methods

### Ethics statement

All animal experiments described in the present study were performed in accordance with the guidelines for Experimental Animals established by the Ministry of Science and Technology (2006, Beijing, China). All protocols and procedures were approved by Institution Animal Care and Use Committee in Poultry Institute, Chinese Academy of Agricultural Science, Yangzhou, China. All efforts were made to minimize animal suffering.

## Animals and muscle sampling

Qingyuan partridge chickens (QY, Guangdong Tiannong Food Ltd, Guangdong, China) were used for microarray analysis in this study. Birds were reared in stairstep caging under continuous lighting using standard conditions of temperature, humidity and ventilation. The starter ration (d 1 to d 21) with 20% crude protein and 2.87 MC/kg differed only slightly from that used in the grower (after d 22) phase; 19% crude protein and 3.0 MC/Kg. Feed and water were provided *ad libitum* during the experiment. Three female chickens from a full-sib family of a preserved population of with average body weight 1330 g were slaughtered at 112 days of age (at sexual maturity). Chickens were killed by stunning followed by exsanguination. Two types of muscle from different locations were sampled immediately after slaughter: the *soleus* muscles (SOL) and the *extensor digitorum longus* muscles (EDL). A  $1 \times 1$  cm<sup>2</sup> section in the middle of the right SOL and EDL was selected, immediately frozen in liquid nitrogen ( $-160^{\circ}\text{C}$ ), and stored at  $-80^{\circ}\text{C}$ . Measurement of the myofiber characteristics including cross-sectional area (CSA), density, size, and myofiber ratios was carried out using mATPase staining. The same portion of the left SOL and EDL muscles were also sampled and immediately frozen in liquid nitrogen, then stored at  $-80^{\circ}\text{C}$  prior to RNA isolation.

Ten female individuals were sampled at different developmental stages after hatching (0, 1, 3, 5, 7, and 9 weeks), and SOL and EDL muscles were collected for the gene expression analysis of *PPARGCIA*.

## Measurements of myofiber characteristics

Serial tissue sections of 12 mm thickness were prepared and myosin ATPase staining was used to identify the myofiber characteristics. These were carried out according to our previous report [23].

## Extraction of RNA

Total RNA from SOL and EDL muscles and primary embryonic myoblasts was extracted using Trizol reagent (Tiangen, China). RNA was purified and DNase-treated using an RNeasy<sup>®</sup> Mini Kit (QIAGEN) according to the manufacturer's instructions. The RNA quantity of each sample was examined using a NanoDrop ND-2000 spectrophotometer (Thermo Scientific) at 260/280 nm (ratio > 2.0). The integrity of total RNA was analysed with the Agilent Bioanalyzer 2100 and RNA 6000 Nano LabChip Kit (Agilent Technologies) with RIN number > 9.

## Microarray analyses

Microarray hybridization was carried out by Shanghai OE Biotech Limited Company (China) using Agilent Chicken Gene Chips (4×44K, ID: 026441) with 43803 probes. The DEGs were selected out by using Significance Analysis of Microarrays (SAM) software with the following screening criteria:  $P \leq 0.05$ ; with a fold change  $\geq 2$ ; or a fold change  $\leq 0.5$ . The gene ontology enrichment analysis was performed for function corresponding to DEGs in chicken using the GOEAST software toolkit ( $P \leq 0.05$ ), and signalling pathway analysis was carried out using KEGG data software. Finally, enrichment analyses of DEGs were performed by using the DAVID 6.7 software.

## qRT-PCR analysis

To validate the microarray hybridization results, seven genes were selected from the DEG list for qRT-PCR assays, the primer sequences were listed in S1 Table. All RNA samples used in

gene-chip hybridization were also detected in qRT-PCR. For the *PPARGC1A* expression in different muscles and developmental stages in Qingyuan partridge chickens, total RNA was reverse-transcribed using a PrimeScript RT Reagent Kit (Takara Co., Japan). qRT-PCR reactions were carried out using the following thermal profile: after an initial denaturation at 94°C for 2 min, amplification was performed with 40 cycles of 94°C for 30 s, followed by annealing for 40 s at temperatures specific for each target gene. For each sample, reactions were set up in triplicate to ensure the reproducibility of the results. At the end of the PCR run, melting curves were generated and analysed to confirm non-specific amplification, and the mean value of each triplicate was used for further calculations. To calculate the mRNA expression of selected genes,  $\Delta\text{Ct}$  values were used for detection of mRNA related to internal control GAPDH expression using the  $2^{-\Delta\Delta\text{Ct}}$  method. Pearson's correlation coefficient was further calculated for each gene on the normalized data to quantify the consistency between microarray experiments and qRT-PCR.

### Statistical analysis

The comparison data between the two myofiber types were analysed using one-way analysis of variance (ANOVA, SPSS 17.0). Data are represented as means  $\pm$  standard error; differences between groups were considered statistically significant at  $P < 0.05$ .

### shRNA design and transfection

shRNA molecules were synthesized by Shanghai GenePharma Co. Ltd (Shanghai, China) with commercial service. Three shRNAs, each targeting different regions of chicken *PPARGC1A* gene were synthesized. The target sequences in chicken *PPARGC1A* gene were as follows: shRNA-1 (5'-GGACTTCACCTAAGCGAAGT-3'), shRNA-2 (5'-GCAGGGATCCCAAGGTAA TAA-3'), and shRNA-3 (5'-GCTCTAGAT CAAGGTCCTTTC-3'). A NC shRNA fragment was produced as the control: 5'-TTCTCCGAACGTGTACGTTTC-3'.

Primary embryonic myoblasts were prepared from 10-day-old Qingyuan partridge chicken embryos as described by Li et al. (2010)[24]. The concentration of the cells was adjusted to  $5 \times 10^6$  cells/ml with DMEM containing 20% FBS. The cells were then seeded in 6-well plates and cultured in a 5% CO<sub>2</sub> incubator at 37°C. When the cells had grown to approximately 70–80% confluence, myoblasts were transfected with the three shRNAs (*PPARGC1A*-shRNA-1, *PPARGC1A*-shRNA-2, *PPARGC1A*-shRNA-3) and the NC control (*PPARGC1A*-shControl), respectively, at a multiplicity of infection (MOI) of 10, followed by the addition of 2.5  $\mu\text{g}/\text{ml}$  polybrene to the medium to improve the efficiency of transfection. Efficiency of transfection was observed at 48 h by counting the ratio of fluorescence cells, and cells were harvested at 72 h, and RNA was extracted from cells to perform qPCR. The expression of *PPARGC1A* gene in cells transfected with different shRNA was compared to that transfected with NC shRNA. Subsequently, we found that *PPARGC1A*-shRNA-2 had the highest transfection efficiency, and we used this for the further transfecting procedures. RNA was collected at 96 h after transfection, and then change in mRNA expression level was analysed for skeletal muscle development and transition-related genes, including *SM*, *FRM*, *MEF2C*, *NFATC3*, and *PPP3CA* (S1 Table).

## Results

### Comparison of myofiber characteristics between SOL and EDL muscles

Compared with *soleus* muscle (SOL), *extensor digitorum longus* (EDL) exhibited a significantly higher cross-sectional area (CSA), diameter, and white myofiber ratio ( $P < 0.05$ ) (Table 1, Fig 1), suggesting that there may be a disparity in the molecular mechanisms behind these differences.

**Table 1. Myofiber characteristics of the SOL and EDL muscles in Qingyuan partridge chickens.**

| Myofiber characteristics                        | SOL <sup>1</sup> | EDL <sup>1</sup> | Sig. <sup>2</sup> |
|-------------------------------------------------|------------------|------------------|-------------------|
| CSA ( $\mu\text{m}^2$ )                         | 1991 $\pm$ 112   | 2863 $\pm$ 331   | *                 |
| Diameter ( $\mu\text{m}$ )                      | 47.8 $\pm$ 1.3   | 57.9 $\pm$ 4.2   | *                 |
| Density (number of fibers per $\mu\text{m}^2$ ) | 428 $\pm$ 23     | 309 $\pm$ 43     | *                 |
| Red myofiber ratio                              | 0.79 $\pm$ 0.02  | 0.15 $\pm$ 0.04  | *                 |
| White myofiber ratio                            | 0.21 $\pm$ 0.02  | 0.85 $\pm$ 0.04  | *                 |

<sup>1</sup> SOL, EDL represent *soleus* muscles and *extensor digitorum longus* muscles, respectively

<sup>2</sup> Significance: \* ( $P < 0.05$ )

<https://doi.org/10.1371/journal.pone.0183118.t001>

## Identification of differentially expressed genes between SOL and EDL muscles

In the present study, 43,803 probes were used to detect mRNA expression profiles in chicken SOL and EDL muscles. Of these, probes displaying hybridization signals represented 80.7–93.7% of the total (detected value:  $P < 0.05$ ), and the remaining genes lacked hybridization signals ( $0.05 < P < 0.065$ ) or showed ambiguous hybridization signals ( $P > 0.065$ ) (Table 2). The microarray assay data discussed in this publication have been submitted to NCBI's Gene Expression Omnibus under series accession number GSE69918.

In total, 1224 genes with at least 2-fold differences were identified at the  $P < 0.05$  significance level ( $P < 0.05$ ,  $FC \geq 2$ ), out of which 654 genes were upregulated and 570 genes were downregulated when comparing SOL to EDL (S2 Table). The variably expressed genes were involved in many functions related to contractile structure and cytoskeleton, cell signalling, energy metabolism, stress, transcription regulation, fatty acid synthesis and metabolism, and others (Table 3).

## Validation of gene expression changes by qRT-PCR

Seven known genes were randomly selected from the variably expressed genes for validation by qRT-PCR. These included five downregulated genes (*MYH1E*, *PPP3CA*, *PPP3R1*, *PRKAG3*, and *FASN*) and two upregulated genes (*PPARGC1A* and *SCD5*) in SOL. With the exception of *FASN*, all selected genes showed significant differences in expression between the two muscles ( $P < 0.05$  or  $P < 0.01$ ) (S1 Fig). Remarkably, all the genes showed similar expression patterns using both methods, and positive correlation between the two methods was found using a Pearson correlation coefficient ranging from 0.59 to 0.95. These results confirm the reliability of the microarray analysis (Fig 2).

## GO and KEGG pathway analysis for DEGs

A total of 1224 significantly different genes were mapped to the Gene Ontology database (geneontology.org), and 74 significantly different GO terms were obtained ( $P < 0.05$ ). These terms were categorized into three groups: biological processes (34 GO terms), molecular functions (20 GO terms), and cellular components (20 GO terms) (S3 Table). According to Gene Ontology, genes that were variably expressed between SOL and EDL and participated in biological process terms were mainly focused on energy metabolism (i.e. small molecule metabolism, carbohydrate metabolism, glycolysis, redox reactions, steroid metabolism, and pyruvate metabolism). Three processes related to muscle development were observed, including transition between fast and slow fiber, embryonic skeletal joint morphogenesis, and skeletal muscle contraction. Six DEGs were found to be involved in these processes: *TNNC1*, *ATP2A2*,

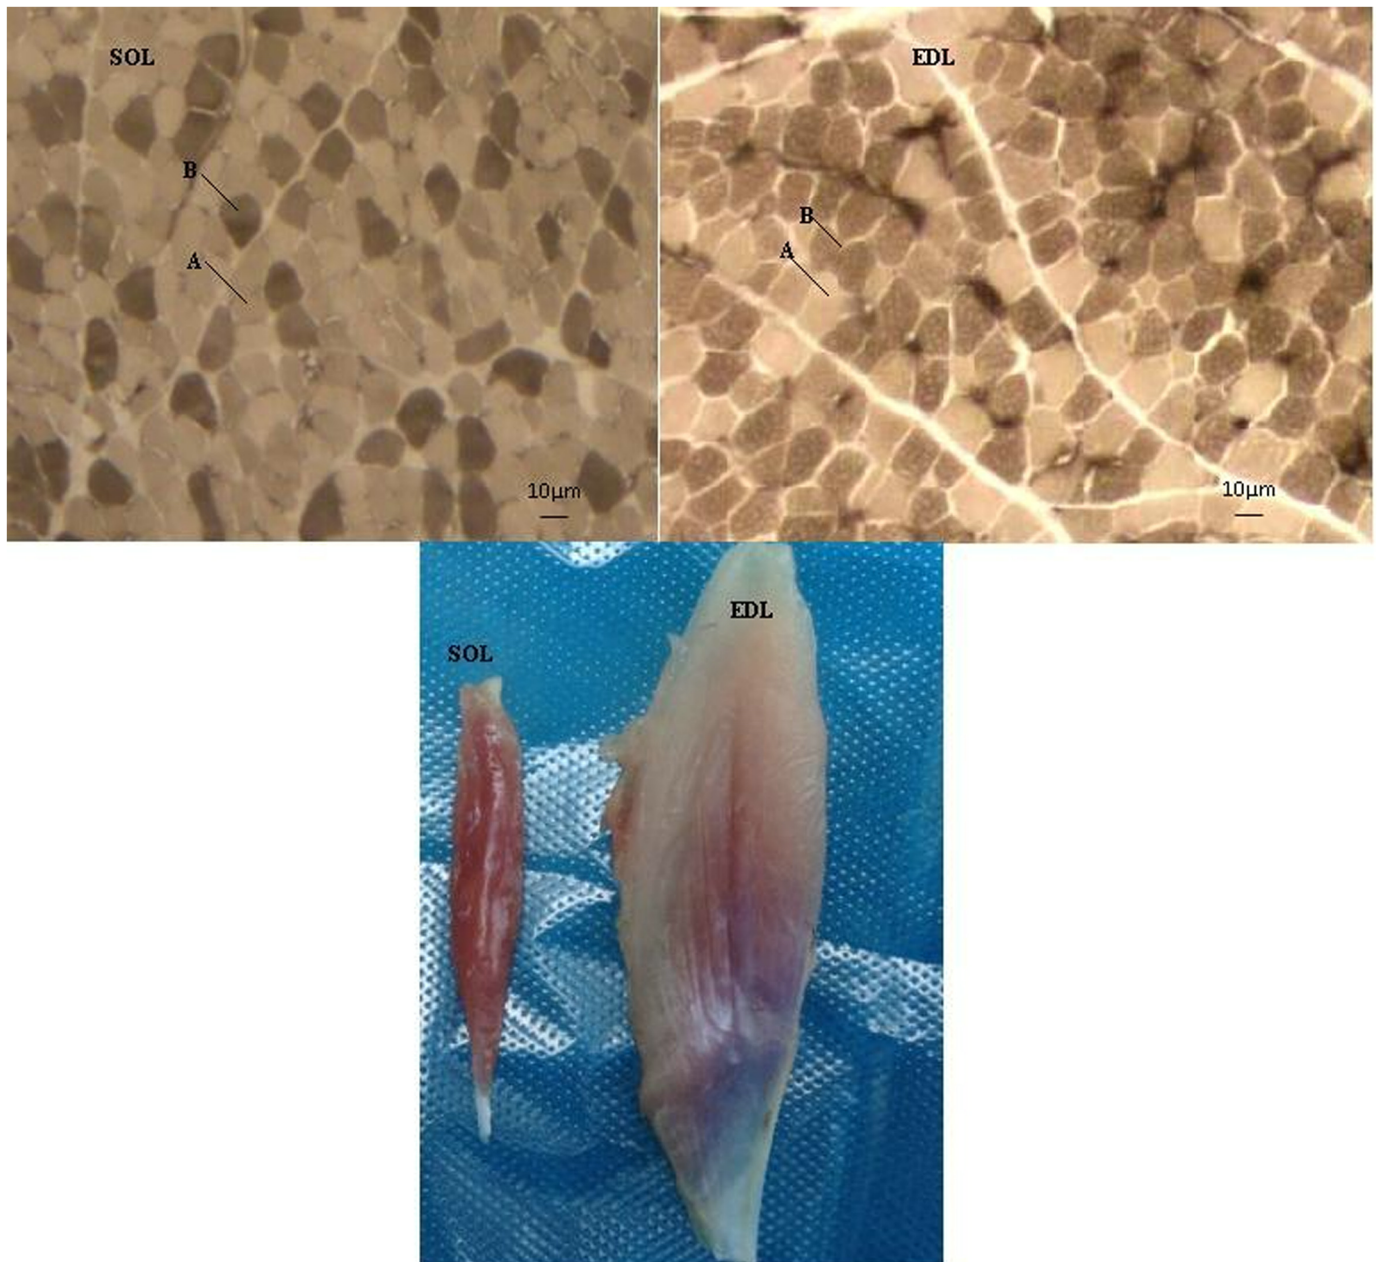

**Fig 1. Morphological and fiber-type variations in SOL and EDL muscle samples of Qingyuan partridge chickens.** A: white fiber, B: red fiber; Bar: 10  $\mu$ m.

<https://doi.org/10.1371/journal.pone.0183118.g001>

**Table 2. Summary of gene expression in SOL and EDL muscles in Qingyuan partridge chickens as determined by microarray analysis.**

| Hybridization signals | <i>SOL1</i> | <i>SOL2</i> | <i>SOL3</i> | <i>EDL1</i> | <i>EDL2</i> | <i>EDL3</i> |
|-----------------------|-------------|-------------|-------------|-------------|-------------|-------------|
| Present Probes        | 38093       | 39256       | 38233       | 41043       | 37239       | 35344       |
| Absent Probes         | 5709        | 4544        | 5567        | 2760        | 6564        | 8454        |
| Marginal Probes       | 1           | 3           | 3           | 0           | 0           | 5           |
| Total probes          | 43803       | 43803       | 43803       | 43803       | 43803       | 43803       |

<https://doi.org/10.1371/journal.pone.0183118.t002>

**Table 3. List of some differentially expressed genes between red and white muscle of Qingyuan partridge chickens.**

| Gene title                                                                               | Fold change | P value | Structure and function                                 | Unigene   |
|------------------------------------------------------------------------------------------|-------------|---------|--------------------------------------------------------|-----------|
| <b>Muscle contraction and cytoskeleton</b>                                               |             |         |                                                        |           |
| myosin heavy chain 7B ( <i>MYH7B</i> )                                                   | 1204.8      | 0.0011  | striated muscle contraction, actin binding             | Gga.103   |
| myosin light chain 2 ( <i>MYL2</i> )                                                     | 141.5       | 0.0055  | abnormal cardiac muscle contractility                  | Gga.841   |
| fast myosin heavy chain ( <i>MYH1E</i> )                                                 | -57.5       | 0.0006  | muscle contraction                                     | Gga.51379 |
| myosin binding protein H ( <i>MYBPH</i> )                                                | -5.0        | 0.0322  | bind to myosin                                         | Gga.882   |
| myosin binding protein C, fast type isoform 2 ( <i>MYBPC2</i> )                          | -3.8        | 0.0085  | bind to myosin                                         | Gga.4986  |
| myosin binding protein C, slow type isoform 1 ( <i>MYBPC1</i> )                          | 3.5         | 0.0060  | bind to myosin                                         | Gga.10173 |
| slow myosin heavy chain 1 ( <i>SM1</i> )                                                 | 4.5         | 0.0054  | muscle contraction                                     | Gga.16803 |
| cysteine and glycine-rich protein 3 ( <i>CSRP3</i> )                                     | 56.5        | 0.0275  | Enlarged myocardial fiber                              | Gga.5554  |
| <b>Transcription factor</b>                                                              |             |         |                                                        |           |
| peroxisome proliferator-activated receptor alpha ( <i>PPARA</i> )                        | 4.1         | 0.0019  | positive regulation of transcription                   | Gga.4006  |
| peroxisome proliferator-activated receptor gamma coactivator 1-alpha ( <i>PPARGC1A</i> ) | 2.2         | 0.0001  | positive regulation of transcription                   | Gga.17979 |
| peroxisome proliferator-activated receptor gamma, coactivator 1 beta ( <i>PPARGC1B</i> ) | 2.2         | 0.0014  | positive regulation of transcription                   |           |
| general transcription factor III C, polypeptide 6, alpha 35 kDa ( <i>GTF3C6</i> )        | -2.2        | 0.0193  | regulation of transcription initiation                 | Gga.22474 |
| Homeobox protein Hox-A2 ( <i>HOXA1</i> )                                                 | -3.6        | 0.0006  | regulation of transcription                            | Gga.55802 |
| Epidermal growth factor receptor kinase substrate 8-like protein 2 ( <i>EPS8L2</i> )     | 2.1         | 0.006   | calcium ion binding, integral to membrane              |           |
| <b>Cell signalling</b>                                                                   |             |         |                                                        |           |
| protein phosphatase 2, catalytic subunit, alpha isozyme ( <i>PPP2CA</i> )                | 3.6         | 0.0009  | Regulation of cell signalling                          | Gga.8891  |
| protein phosphatase 3, catalytic subunit, alpha isozyme ( <i>PPP3CA</i> )                | -3.6        | 0.0234  | Regulation of cell signalling                          | Gga.48561 |
| protein phosphatase 3, regulatory subunit B, alpha ( <i>PPP3R1</i> )                     | -2.0        | 0.0200  | Regulation of cell signalling                          | Gga.3833  |
| vascular endothelial growth factor A ( <i>VEGFA</i> )                                    | 2.9         | 0.0143  | Regulation of growth retardation                       | Gga.537   |
| fibronectin type III domain containing 5 ( <i>FNDC5</i> )                                | 4.5         | 0.0091  | extracellular region                                   | Gga.6248  |
| Collagen, type I, alpha 1                                                                | -4.2        | 0.0439  | phosphate transport, cell adhesion                     | Gga.2073  |
| collagen, type IX, alpha 3 ( <i>COL9A3</i> )                                             | 3.8         | 0.02    | phosphate transport, cell adhesion                     | Gga.3459  |
| collagen, type III, alpha 1 ( <i>COL3A1</i> )                                            | -3.1        | 0.0228  | phosphate transport, cell adhesion                     | Gga.42140 |
| <b>Metabolic enzyme</b>                                                                  |             |         |                                                        |           |
| protein kinase, AMP-activated, gamma 3 non-catalytic subunit ( <i>PRKAG3</i> )           | -10.8       | 0.0017  | AMP-activated protein kinase activity                  | Gga.22949 |
| calpain 3, (p94) ( <i>CAPN3</i> )                                                        | -2.1        | 0.0362  | calcium-dependent cysteine-type endopeptidase activity | Gga.72    |
| pyruvate dehydrogenase kinase, isozyme 1 ( <i>PDK1</i> )                                 | 4.7         | 0.0003  | phosphorylate pyruvate dehydrogenase                   | Gga.21396 |
| heme oxygenase 1 ( <i>HMOX1</i> )                                                        | 2.2         | 0.0378  | heme oxidation                                         | Gga.2039  |
| phosphoglucomutase 1 ( <i>PGM1</i> )                                                     | -3.7        | 0.024   | phosphotransferases, carbohydrate metabolic process    | Gga.33728 |
| creatine kinase, mitochondrial 1A ( <i>CKMT1A</i> )                                      | -2.7        | 0.0011  | transferring phosphorus-containing groups              | Gga.13490 |
| <b>Fatty acid synthesis and metabolism</b>                                               |             |         |                                                        |           |
| stearoyl-CoA desaturase 5 ( <i>SCD5</i> )                                                | 2.2         | 0.0069  | Fatty acid synthesis                                   | Gga.41967 |
| fatty acid synthase ( <i>FASN</i> )                                                      | -2.3        | 0.0000  | fatty acid synthesis                                   | Gga.5501  |
| lipoprotein lipase ( <i>LPL</i> )                                                        | 3.1         | 0.0121  | fatty acid uptake and transport                        | Gga.1152  |
| fatty acid binding protein 3, muscle and heart ( <i>FABP3</i> )                          | 4.1         | 0.0039  | fatty acid uptake and transport                        | Gga.12266 |

“+” and “-” indicates up or downregulated expression in the *soleus* group.

<https://doi.org/10.1371/journal.pone.0183118.t003>

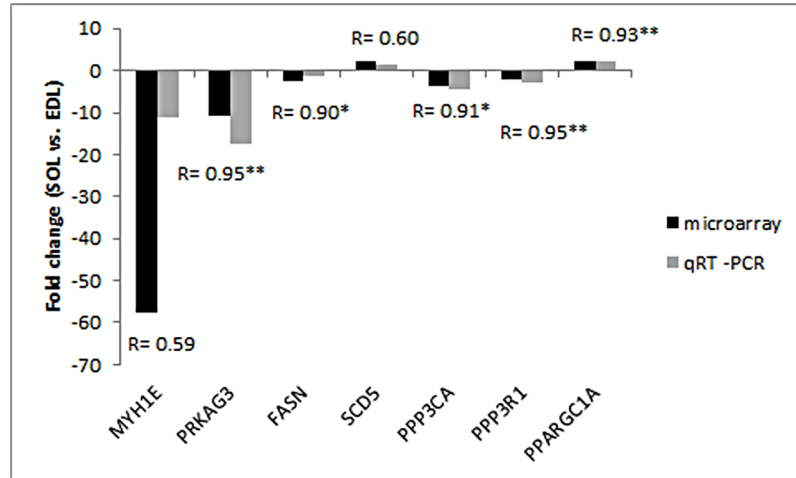

**Fig 2. Difference of fold change in mRNA level of each gene between microarray and qRT-PCR analysis.** Fold changes were calculated as mRNA levels in SOL compared with EDL. Bars above X-axis indicate that genes were highly expressed in SOL, whereas those under X-axis indicate that genes were highly expressed in EDL. R indicates the Pearson correlation coefficient. \* indicates significance level at  $P < 0.05$ ; \*\* indicates significance level at  $P < 0.01$ .

<https://doi.org/10.1371/journal.pone.0183118.g002>

*HOXD11*, *COL2A1*, *CHRNA1*, and *TNNI2*. These genes may be crucial to muscle composition and development.

The identified DEGs were significantly enriched in twenty KEGG pathways ( $P < 0.05$ ), with the most influenced pathway being adrenergic signalling in cardiomyocytes (Fig 3). Well-known pathways affecting muscle fiber transition (calcium and PPAR signalling), muscle development (insulin signalling) and lipid metabolism (adipocytokine- signalling) were enriched in both types of muscles (S4 Table). There was 62 DEGs in these four pathways, including *ATP2A2*, *PRKAG3*, *PPARGC1A*, and *TNNC1*.

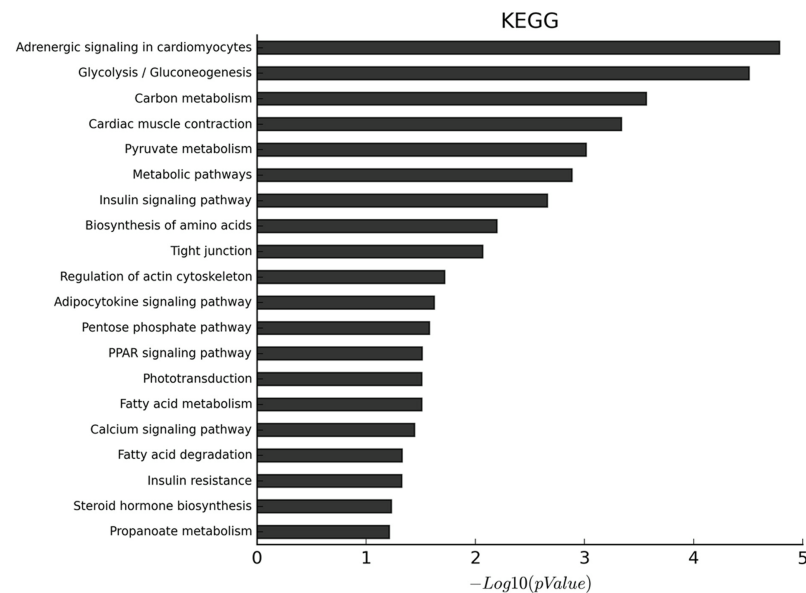

**Fig 3. Enriched KEGG pathway for all DEGs identified between SOL and EDL muscles.**

<https://doi.org/10.1371/journal.pone.0183118.g003>



## Coexpressed gene network for DEGs

Subsequently, Pearson's correlation analysis was used to investigate the gene correlations for some known DEGs related to muscle development and composition according to the previous reports [17–22]. Three hundred mRNA-mRNA couples with  $r^2 > 0.8$  and  $P < 0.05$  were selected, and Cytoscape 3.3 software was used to construct gene networks. The results showed that *PPP2CA*, *PRKAG3*, *ATP2A2*, *PPARGC1A*, and *PPARGC1B* were node genes (Fig 4).

The results of the GO, KEGG pathway, and gene coexpression network analyses indicated that *PRKAG3*, *ATP2A2*, and *PPARGC1A* might be key genes that determine chicken muscle fiber characteristics. *ATP2A2* and *PPARGC1A* mRNA levels were higher in oxidative muscle than in glycolytic muscle. In the present study, we chose *PPARGC1A* for further functional analysis.

## *PPARGC1A* mRNA expression in SOL and EDL tissues in postnatal Qingyuan partridge chickens

Throughout early development of Qingyuan partridge chicks, *PPARGC1A* mRNA expression exhibited a similar pattern in the SOL and EDL tissues. Expression level was the highest at birth (week 0), then decreased significantly from week 1 to week 3 ( $P < 0.05$ ), followed by an increase from week 3 to week 5, then a decrease from week 5 to week 7, and finally a significant elevation at week 9 ( $P < 0.05$ ) (Fig 5). The expression of *PPARGC1A* was consistently higher in SOL muscle than in EDL muscle throughout development, with significant differences observed at 0, 1, and 5 weeks ( $P > 0.05$ ).

## Effect of *PPARGC1A*-shRNA-2 recombinant virus on expression of myofiber-related genes

The three shRNAs (*PPARGC1A*-shRNA-1, *PPARGC1A*-shRNA-2, and *PPARGC1A*-shRNA-3) decreased *PPARGC1A* gene expression by 49.7%, 63.7%, and 59.9%, respectively (Fig 6A). Therefore, *PPARGC1A*-shRNA-2 was used for transfecting myoblast cells. At 96 h after transfection, qRT-PCR results showed an effective inhibition of *PPARGC1A* expression ( $P < 0.01$ ) (Fig 6B). Moreover, knockdown of *PPARGC1A* expression resulted in significant downregulation of some muscle development and transition related genes, including *PPP3CA* ( $P < 0.01$ ), *MEF2C* ( $P < 0.05$ ), and *SM* ( $P < 0.01$ ), whereas *FWM* expression was significantly upregulated ( $P < 0.05$ ), and the expression change of *NEATC3* was not significantly ( $P > 0.05$ ) (Fig 6B).

## Discussion

The Qingyuan partridge chicken is an important indigenous breed in south of China, and consumption habits of the local people like to eat female chickens, so we chose female Qingyuan partridge chickens as research materials in the present study. Muscle fiber composition can influence meat quality traits, including colour, tenderness, water-holding capacity, juiciness, and flavour [7, 8, 25]. A high content of type I (oxidative) fiber contributes more to juiciness and flavour [25]. Our results showed significant phenotypic differences between SOL and EDL muscles in Qingyuan partridge chickens, wherein EDL exhibited a significant higher cross-sectional area (CSA), diameter, and white myofiber ratio than SOL. Although some DEGs between different skeletal muscles have recently been identified in several species, such as mice [17], pigs [18–20], and duck [21], the molecular mechanism underlying muscle fiber characteristics in chicken remains unclear. Therefore, our objective was to clarify the biological events, which could explain phenotypic differences between the SOL and EDL in chicken. In brief, 1224 differentially expressed probes between SOL and EDL were identified, and the fold-

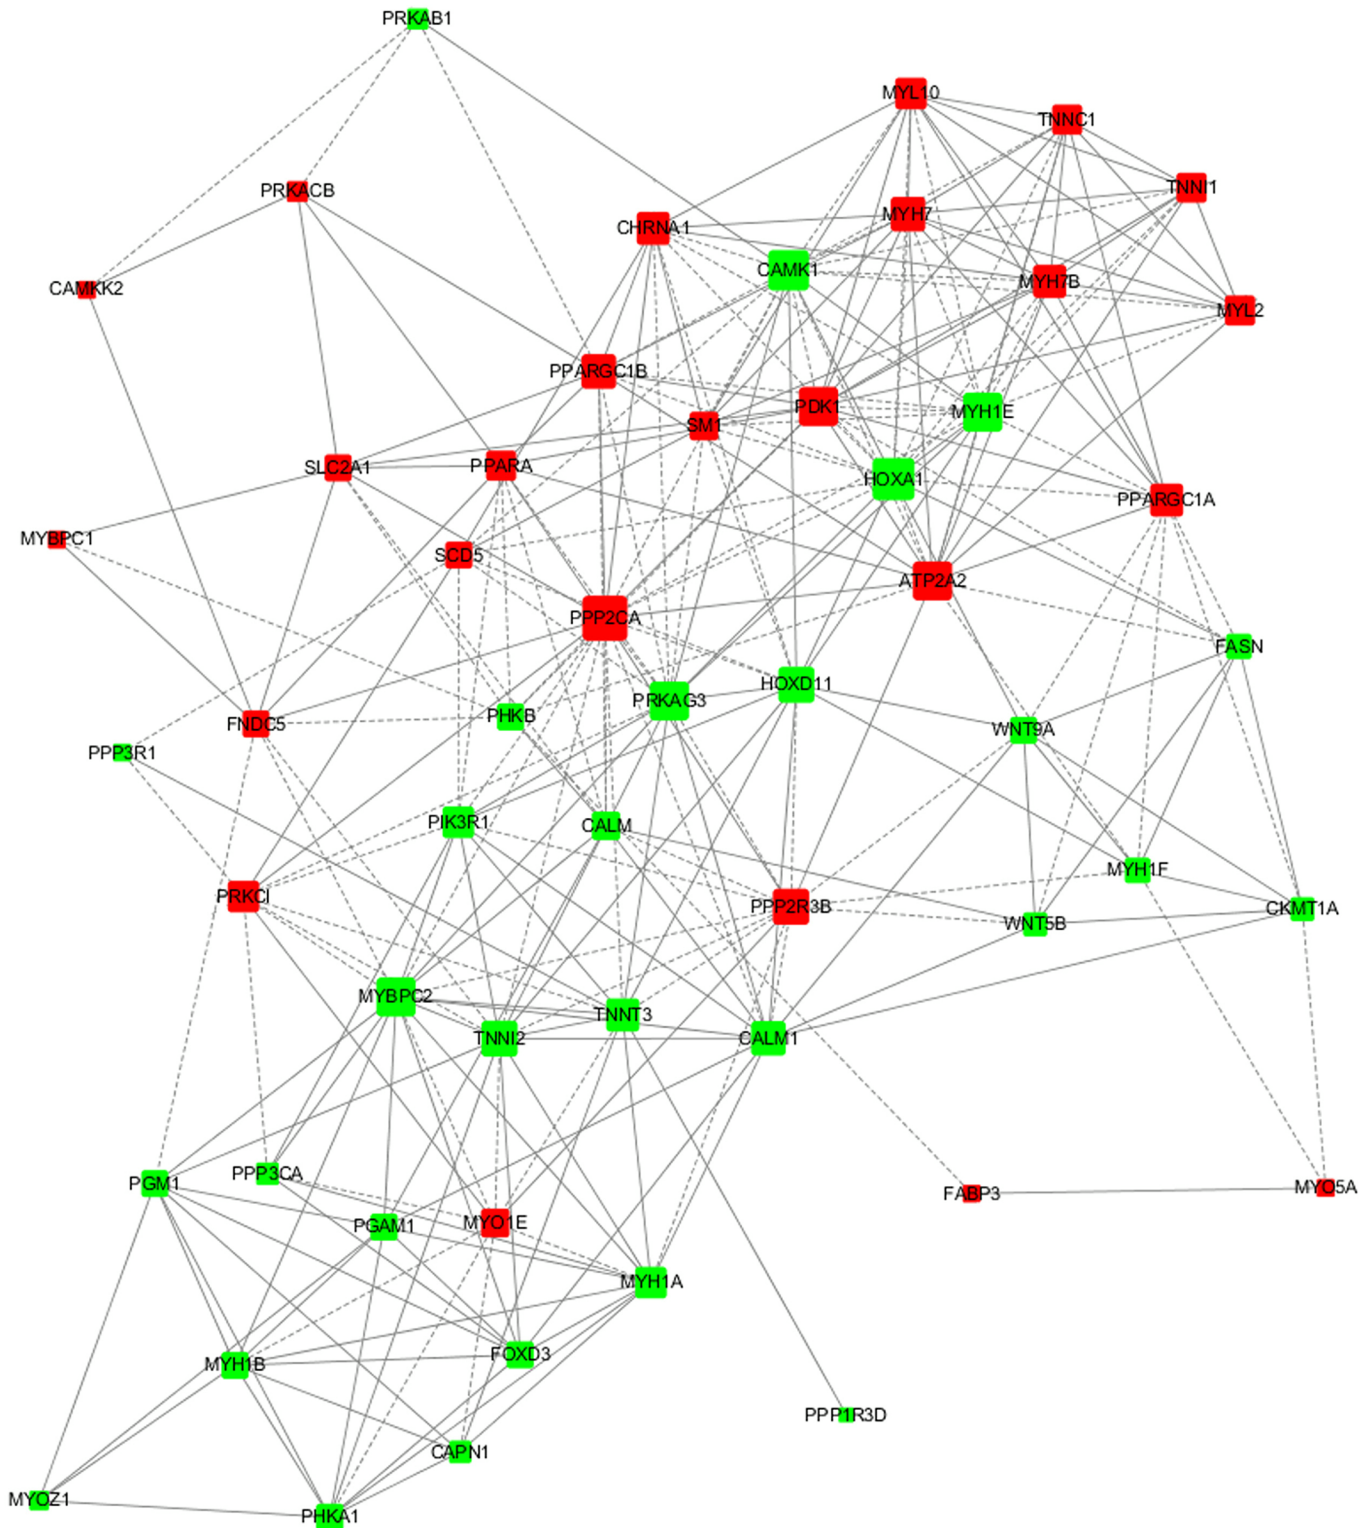

**Fig 4. Coexpressed gene network for the selected DEGs.** Genes exhibiting upregulation are shown in red, whereas genes exhibiting downregulation are shown in green. The colour intensity indicates the degree of up/downregulation. Solid lines and dashed lines indicate positive correlation and negative correlation, respectively.

<https://doi.org/10.1371/journal.pone.0183118.g004>

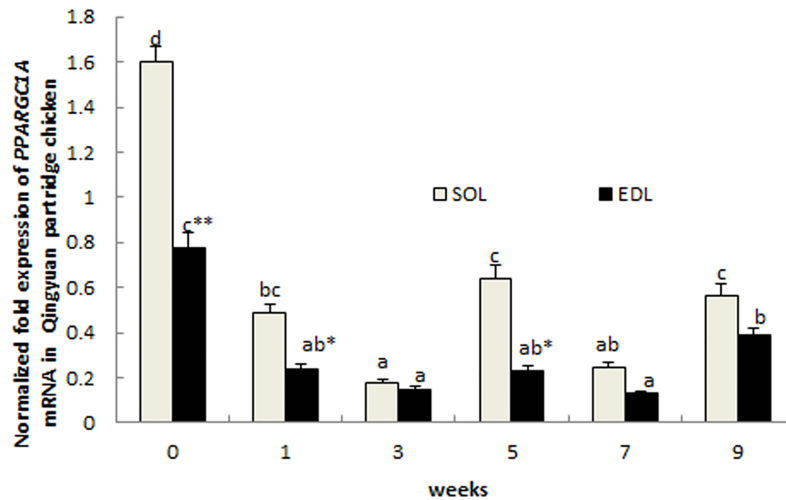

**Fig 5. *PPARGC1A* gene expression levels in SOL and EDL muscles in Qingyuan partridge chickens during early post-hatching development.** \*\* and \* indicated  $P < 0.01$  and  $P < 0.05$ , respectively. Bar diagram values with the same letter are not significantly different among different ages in the same tissue ( $P > 0.05$ ), and values with different letters are significantly different between different ages in the same tissue ( $P < 0.05$ ).

<https://doi.org/10.1371/journal.pone.0183118.g005>

change directions of the DEGs observed in microarray analysis have been validated by qRT-PCR analyses. The number of genes found differentially expressed between oxidative and glycolytic muscles is relatively high, when compared with those DEGs found in pigs and ducks. There were 159 DEGs between red (soleus) and white muscles (extensor digitorum

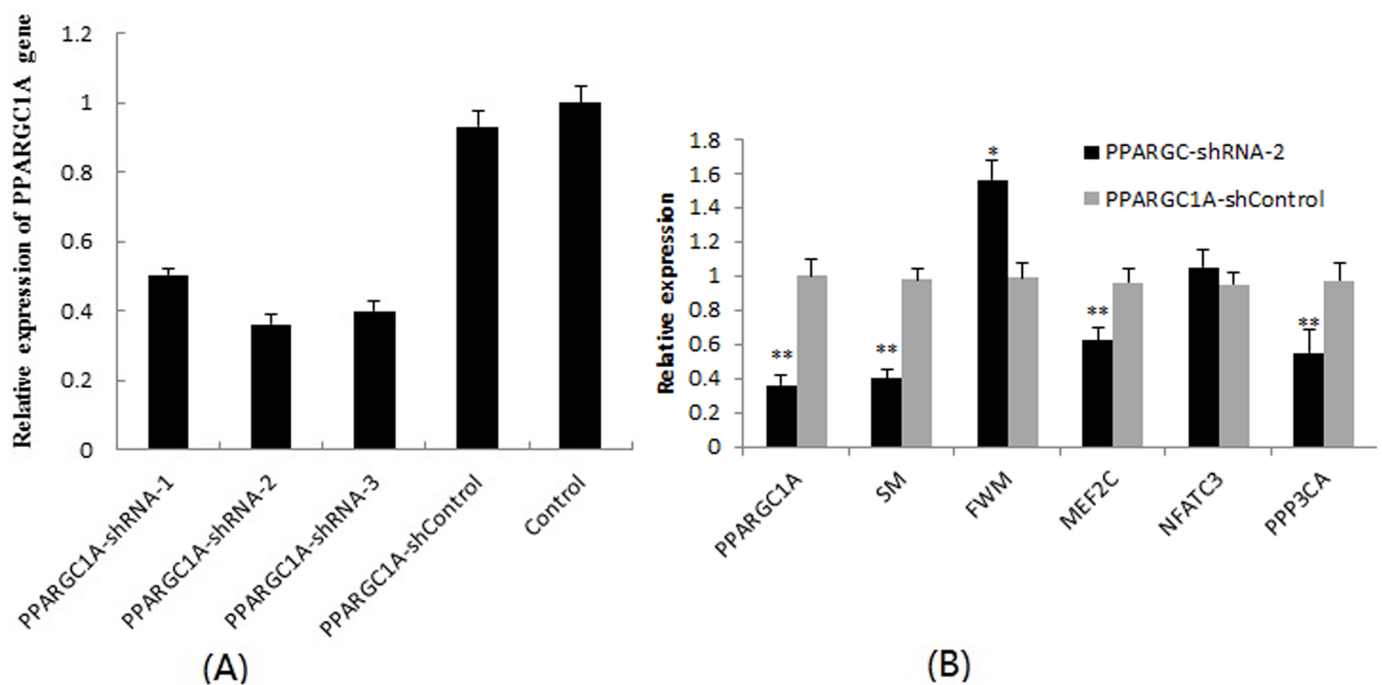

**Fig 6. *PPARGC1A* expression in myoblasts and the up/downregulation of myofiber-related genes.** (A) Relative expression of *PPARGC1A* in myoblasts transfected with different shRNAs; (B) Relative expression changes of myofiber-related genes in myoblasts transfected with shRNA-1317. \*\*and\*indicated  $P < 0.01$  and  $P < 0.05$ , respectively.

<https://doi.org/10.1371/journal.pone.0183118.g006>

longus) in Chinese Meishan pigs [19], 561 DEGs between red (soleus) and white muscles (extensor digitorum longus) in large white pigs [20], and 168 DEGs between leg muscle and pectoral muscle in ducks [21]. However, different experimental conditions such as species, sample size, technology platform, FC threshold might account for this discrepancy.

## Function of DEGs implicated in muscle development and composition

The diversity in muscle fiber expression and accumulation of contractile proteins in adult animals appears to be directed by neural activity [26], so genes that are related to muscle development, energy metabolism, lipid metabolism or nerve activity would contribute to the differentiation and maturation of skeletal muscle fibers. In the present study, There are 14 DEGs (*MYH7B*, *CSRP3*, *TNNT2*, *RSPO3*, *MYL1*, *MYBPC1*, *PRSS35*, *P4HA3*, *XPO4*, *FREM2*, *FBP1*, *SMTNL2*, *SMYD1*, *FAT3*) were also found between oxidative and glycolytic muscles in both pigs [19, 20] and ducks [21], these genes might be related to skeletal myofiber composition. Moreover, several DEGs were also been previously studied in the other species, such as *PGM1*, *fibronectin*, *HMOX1*, *SM1*, *MYH1E*, *PPARGC1A*, *PPARGC1B*, *PPP3CA*, and *PPP3R1* [17, 27–29]. Genes related to slow-type muscle protein encoding (*MYBPC1*, *SM1*), energy metabolism (*PDK1*, *PPARA*) and muscle contraction (*MYH7B*, *MYL2*) which could contribute to better meat quality of red muscle, were more highly expressed in oxidative muscle than in glycolytic muscle. All of these variances in the gene profile can provide explanation for the differences in the fiber types in SOL and EDL muscles.

GO analysis demonstrated that genes involving in energy metabolism and muscle development were over-represented in both type of muscles, consistent with the distinct energy expenditure regulation features among different fiber types [30], and also consistent with the differences found between red and white skeletal muscle of Chinese Meishan pigs [19]. Energy availability plays an important role in the formation, proliferation, and differentiation of mature muscle fibers. Louis et al. (2004) reported that the energy content of cultured satellite cells could affect myofiber hypertrophy in vitro, which indicates that there is a direct relationship between myogenesis and energy metabolism [31]. Cagnazzo et al. (2006) also reported a direct connection between energy metabolism and myogenic differentiation [32].

Based on the functional annotation analysis of DEGs from different muscle tissues, we identified adrenergic signalling in cardiomyocytes was the most significantly enriched pathway. The adrenergic signalling system is an important protein signalling system, which can regulate  $[Ca^{2+}]_i$  transients, cardiac action potential duration, and contraction force [33]. Moreover, other enriched pathways were muscle fiber transition (calcium and PPAR signalling), muscle development (insulin signalling) and lipid metabolism (adipocytokine signalling), suggesting that the regulation of muscle development and composition is possibly affected by the interaction of complex pathway involving muscle, fat and connective tissue. Calcium signalling has been implicated through calcineurin-a calcium-calmodulin (CaM)-dependent protein phosphatase and CaM kinase in the control of type I fiber-specific contractile proteins [34, 35]. PPAR signalling is important in muscle fiber type regulation [36]. Insulin such as IGF-I has long been recognized as having the ability to stimulate the rate of myoblast differentiation [37] and influence myogenin expression [38].

Microarray experiments result in a large number of variably expressed genes, and the further functional data analysis is essential to determine relevant biological interpretations. In this context, some DEGs that were related to muscle development and composition finding in GO and pathway analysis or former literature reports [17–21] were chosen for coexpressed gene network analysis. Importantly, we identified three crucial genes (*PRKAG3*, *ATP2A2*, and *PPARGC1A*) which may be related to chicken myofiber composition. Network analysis

indicated that *PRKAG3*, *ATP2A2*, and *PPARGC1A* interacted with each other, consistent with a previous report [39]. *PRKAG3* is a  $\gamma$ 3 subunit of AMPK (a heterotrimeric serine/threonine protein kinase), which is exclusively expressed in skeletal muscle. In the present study, *PRKAG3* mRNA levels were significantly higher in EDL than that in SOL muscles (FC = 10.82,  $P < 0.01$ ), which could imply a higher response of the AMPK complex to AMP, which in turn would be consistent with greater amounts of glycogen in muscle. This result was also consistent with the previous reports that  $\gamma$ 3 is more highly expressed in fast-twitch glycolytic than oxido-glycolytic fibers, and is even undetectable in slow-twitch oxidative fibers in mammals [40]. *ATP2A2* is a gene encoding a slow skeletal and cardiac muscle-specific  $\text{Ca}^{2+}$  ATPase, SERCA2. Wei et al. (2015) reported that *ATP2A2* could regulate slow-twitch muscle gene expression [41]. The highly expressed of *ATP2A2* mRNA level in SOL (FC = 151.9,  $P < 0.001$ ) in the present study also supported this conclusion. The peroxisome proliferator-activated receptor-gamma coactivator-1A (*PPARGC1A*, also known as *PGC-1 $\alpha$* ), which was originally identified via its functional interaction with peroxisome proliferator-activated receptor gamma, is an important regulator of many metabolic pathways [27, 42]. Importantly, *PPARGC1A* has been implicated as a principal factor in regulating muscle fiber type determination, and has been shown to drive fast/glycolytic fiber type switching to slow/oxidative fibers [27, 43]. Our previous study investigated the genetic effects of the *PPARGC1A* gene on chicken skeletal muscle fiber characteristics, and found that the polymorphisms of the *PPARGC1A* gene and their haplotypes are associated with chicken skeletal myofiber type traits [2]. Therefore, *PPARGC1A* was chosen for the further functional analysis.

### The function of *PPARGC1A* gene in muscle fiber composition

*PPARGC1A* mRNA expression patterns in SOL and EDL were further analysed during early postnatal development stages of Qingyuan partridge chickens. Expression levels were higher in SOL than in EDL muscles throughout the studied development. This result was consistent with that of a previous study by Lin et al. (2002) in mice, wherein *PGC-1 $\alpha$*  messenger RNA expression was shown to mimic the expression of troponin I (slow), a classical marker of type I fiber; *PGC-1 $\alpha$*  is highly expressed in *soleus* but has much lower expression in type II-rich muscles such as EDL, *quadriceps*, *tibialis anterior*, and *gastrocnemius* [27]. Moreover, the mRNA expression of *PPARGC1A* exhibited a similar pattern in both SOL and EDL muscles, wherein the highest expression level occurred at hatching, and then decreased significantly to a relatively low level. Muscle fiber formation is completed at hatching in avian, and postnatal muscle growth is determined by myofiber hypertrophy, which is accompanied with myofiber-type transformation following the sequence: SM-FRM-FWM [44]. The highest expression at birth may also indicate that *PPARGC1A* has some effect on the formation of myofibers.

RNA interference (RNAi) mediated by short hairpin RNAs (shRNAs) has become a powerful tool for gene knockdown studies. To further study the function of *PPARGC1A* gene in myofiber transition, we transfected chicken embryo primary myoblasts with three lentivirus-mediated *PPARGC1A* shRNA constructs and observed 49.7–63.7% reductions in *PPARGC1A* transcript levels. The efficiency of transfection and knockdown was relatively high in primary myoblast cells comparing to the similar knockdown studies in myoblast cells [45, 46]. These results demonstrate that lentivirus-mediated *PPARGC1A* shRNA can successfully silence *PPARGC1A* gene expression in chicken embryo myoblasts. Under knockdown, genes involved in calcium signalling such as *PPP3CA* and *MEF2C* and the MyHC SM isoform were significantly downregulated, whereas the MyHC FRM isoform was significantly upregulated, suggesting that *PPARGC1A* may play an important role in chicken myofiber composition and can co-activate the transcriptional activity of calcium signalling genes. Calcium signalling is a chief

regulatory pathway of type I fiber-selective gene expression [47]. Our results also supported the previous report that cooperation between *PPARGC1A* and the calcineurin pathway is probably critically important in myofiber type switching, and a significant portion of this interaction may occur as a consequence of the direct co-activation of Mef2 proteins by *PPARGC1A* [27].

## Conclusions

The present study provided a global transcriptome analysis between oxidative (SOL) and glycolytic (EDL) muscles in Qingyuan partridge chickens. The results suggest that the identified DEGs are related to the phenotypic differences of these two muscles. *PRKAG3*, *ATP2A2*, and *PPARGC1A* may play key roles in chicken myofiber composition and transition. Further expression analysis and shRNA analysis demonstrated that *PPARGC1A* is a key gene involved in chicken myofiber composition and transition. Our observations provide a basis for further exploration of these molecular processes.

## Supporting information

**S1 Fig. Relative mRNA expression of the seven selected genes between SOL and EDL by qRT-PCR.** \* indicates significance level at  $P < 0.05$ ; \*\* indicates significance level at  $P < 0.01$ . (TIF)

**S1 Table. Descriptions of all primers used in this study.**  
(XLS)

**S2 Table. Detailed information on DEGs between SOL and EDL in Qingyuan partridge chickens.**  
(XLS)

**S3 Table. The GO category for DEGs between SOL and EDL in Qingyuan partridge chickens.**  
(XLS)

**S4 Table. Identification of enriched KEGG pathways based on the DEGs between SOL and EDL in Qingyuan partridge chickens.**  
(XLS)

## Acknowledgments

We thank Zhang Ying from Guangdong Tiannong Food Ltd giving us the research chickens.

## Author Contributions

**Conceptualization:** Tu Yunjie.

**Data curation:** Xiao Qin, Shan Yanju, Sheng Zhongwei.

**Formal analysis:** Shan Yanju, Ji Gaige, Sheng Zhongwei.

**Funding acquisition:** Shu Jingting, Zou Jianmin.

**Investigation:** Ji Gaige.

**Methodology:** Zhang Ming.

**Project administration:** Shu Jingting, Zou Jianmin.

**Resources:** Xiao Qin, Tu Yunjie.

**Software:** Zhang Ming.

**Supervision:** Zou Jianmin.

**Writing – original draft:** Shu Jingting.

**Writing – review & editing:** Zou Jianmin.

## References

1. China National Commission of Animal Genetic Resources. Animal genetic resources in China Poultry, first edition. China Agriculture Press. Beijing, China. 2011; P: 112–113.
2. Shu JT, Xu WJ, Zhang M, Song WT, Shan YJ, Song C, et al. Transcriptional co-activator PGC-1 $\alpha$  gene is associated with chicken skeletal muscle fiber types. *Genet Mol Res.* 2014; 13(1): 895–905. <https://doi.org/10.4238/2014.February.14.19> PMID: 24615053
3. Berri CN, Wacrenier N, Millet N, Le Bihan-Duval EL. Effect of selection for improved body composition on muscle and meat characteristics of broilers from experimental and commercial lines. *Poult Sci.* 2001; 80 (7): 833–838. PMID: 11469641
4. Huff-Lonergan E, Bass TJ, Malek M, Dekkers JC, Prusa K, Rothschild MF. Correlations among selected pork quality traits. *J. Anim. Sci.* 2002; 80: 617–627. PMID: 11892678
5. Matsakas A, Patel K. Skeletal muscle fiber plasticity in response to selected environmental and physiological stimuli. *Histol Histopathol.* 2009; 24: 611–629. <https://doi.org/10.14670/HH-24.611> PMID: 19283669
6. Choi YM, Kim BC. Muscle fiber characteristics, myofibrillar protein isoforms, and meat quality. *Livest Sci.* 2009; 122: 105–118.
7. Karlsson AH, Klont RE, Fernandez X. Skeletal muscle fibers as factors for pork quality. *Livest Prod Sci.* 1999; 60: 255–269.
8. Pette D, Staron RS. Transitions of muscle fiber phenotypic profiles. *Histochem cell boil.* 2001; 115: 359–372.
9. Khan MA. Histochemical sub-types of three fiber-types of avian skeletal muscle. *Histo chem.* 1976; 50: 9–16.
10. Pannier L, Mullen AM, Hamill RM, Stapleton PC, Sweeney T. Association analysis of single nucleotide polymorphisms in DGAT1, TG and FABP4 genes and intramuscular fat in crossbred *Bos taurus* cattle. *Meat Sci.* 2010; 85: 515–518. <https://doi.org/10.1016/j.meatsci.2010.02.025> PMID: 20416823
11. Raj S, Skiba G, Weremko D, Fandrejowski H, Migdal W, Borowiec F, et al. The relationship between the chemical composition of the carcass and the fatty acid composition of intramuscular fat and backfat of several pig breeds slaughtered at different weights. *Meat Sci.* 2010; 86: 324–330. <https://doi.org/10.1016/j.meatsci.2010.04.037> PMID: 20665991
12. Duggan DJ, Bittner M, Chen Y, Meltzer P, Trent JM. Expression profiling using cDNA microarrays. *Nat Genet.* 1999; 21(Suppl): S10–S14.
13. Jiang Y, Shang H, Xu H, Ding X, Zhao L, Fang L, et al. Detection and genotyping of porcine circovirus in naturally infected pigs by oligo-microarray. *Res Vet Sci.* 2010; 89: 133–139. <https://doi.org/10.1016/j.rvsc.2010.01.009> PMID: 20137797
14. Paturi G, Phillips M, Kailasapathy K. Comparison of functional assay and microarray analysis for determination of *Lactobacillus acidophilus* LAFTI L10 induced gut immune responses in mice. *Food Res Int.* 2010; 43: 856–861.
15. Wei L, Li JH, Dan L. Microarray analysis of differently expressed microRNA profiles induced by UVB irradiated in mice skin. *J Invest Dermatol.* 2010; 130: S132–S132.
16. Wu T, Zhang ZH, Yuan ZQ, Li JL, Chen J, Wang YZ, et al. Distinctive Genes Determine Different Intramuscular Fat and Muscle Fiber Ratios of the longissimusdorsi Muscles in Jinhua and Landrace Pigs. *PLoS ONE.* 2013; 8: e53181. <https://doi.org/10.1371/journal.pone.0053181> PMID: 23301040
17. Campbell WG, Gordon SE, Carlson CJ, Pattison CJ, Hamilton MT. Differential global gene expression in red and white skeletal muscle. *Am J Physiol Cell Physiol.* 2001; 280: 763–768.
18. Bai Q, McGillivray C, Costa ND, Dornan S, Evans G, Stear MJ. Development of a porcine skeletal muscle cDNA microarray: Analysis of differential transcript expression in phenotypically distinct muscles. *BMC Genomics.* 2003; 4: 8–8. <https://doi.org/10.1186/1471-2164-4-8> PMID: 12611633

19. Li Y, Xu Z, Li H, Xiong Y, Zuo B. Differential transcriptional analysis between red and white skeletal muscle of Chinese Meishan pigs. *Int J Biol Sci*. 2010; 6(4): 350–360. PMID: [20617128](#)
20. Zhu JY, Shi XE, Lu HZ, Xia B, Li YF, Li X, et al. RNA-seq transcriptome analysis of extensor digitorum longus and soleus muscles in large white pigs. *Mol Genet Genomics*. 2016; 291(2): 687–701. <https://doi.org/10.1007/s00438-015-1138-z> PMID: [26520103](#)
21. Zhang RP, Liu HH, Liu JP, Hu JW, Yan XP, Wang DMC, et al. Transcriptional profiling identifies locationspecific and breed-specific differentially expressed genes in embryonic myogenesis in *Anas Platyrhynchos*. *PLoS ONE*. 2015; 10(12): e0143378. <https://doi.org/10.1371/journal.pone.0143378> PMID: [26630129](#)
22. Zheng Q, Zhang Y, Chen Y, Yang N, Wang XJ, Zhu DH. Systematic identification of genes involved in divergent skeletal muscle growth rates of broiler and layer chickens. *BMC Genomics*. 2009; 10: 87. <https://doi.org/10.1186/1471-2164-10-87> PMID: [19232135](#)
23. Li HF, Shu JT, Shan YJ, Chen WF, Song C, Xu WJ. Myofiber development during embryonic to neonatal development in duck breeds differing in muscle growth rates. *J INTEGR AGR*. 2016; 15(2): 403–413.
24. Li FH, Hou LL, Ma YH, Pang QH, Guan WJ. Isolation, culture, identification and muscle differentiation of skeletal muscle satellite cells in Beijing fatty chicken. *Scientia Agricultura Sinica*. 2010; 43(22): 4725–4731.
25. Sibut V, Hennequet-Antier C, Bihan-Duval EL, Marthey S, Duclos MJ, Berri C. Identification of differentially expressed genes in chickens differing in muscle glycogen content and meat quality. *BMC Genomics*. 2011; 12(1): 112.
26. Renand G, Picard B, Touraille C, Berge P, Lepetit J. Relationships between muscle characteristics and meat quality traits of young Charolais bulls. *Meat Sci*. 2001; 59: 49–60. PMID: [22062505](#)
27. Lin J, Wu H, Tarr PT, Zhang CY, Wu ZD, Boss O, et al. Transcriptional co-activator PGC-1 $\alpha$  drives the formation of slow-twitch muscle fibers. *Nature*. 2002; 418: 797–801. <https://doi.org/10.1038/nature00904> PMID: [12181572](#)
28. Mortensen OH, Frandsen L, Schjerling P, Nishimura E, Grunnet N. PGC-1 $\alpha$  and PGC-1 $\beta$  have both similar and distinct effects on myofiber switching toward an oxidative phenotype. *Am J Physiol Endocrinol Metab*. 2006; 291: E807–E816. <https://doi.org/10.1152/ajpendo.00591.2005> PMID: [16720625](#)
29. Schiaffino S, Serrano AL. Calcineurin signaling and neural control of skeletal muscle fiber type and size. *Trends Pharmacol Sci*. 2002; 23: 569–75. PMID: [12457775](#)
30. Vidal-Puig A, Solanes G, Grujic D, Flier JS, Lowell BB. UCP3: an uncoupling protein homologue expressed preferentially and abundantly in skeletal muscle and brown adipose tissue. *Biochem Biophys Res Commun*. 1997; 235: 79–82.
31. Louis M, Van Beneden R, Dehoux M, Thissen JP, Francaux M. Creatine increases IGF-I and myogenic regulatory factor mRNA in C2C12 cells. *FEBS Lett*. 2004; 557: 243–247. PMID: [14741375](#)
32. Cagnazzo M, Te Pas MF, Priem J, De Wit AA, Pool MH, Davoli R, et al. Comparison of prenatal muscle tissue expression profiles of two pig breeds differing in muscle characteristics. *J Anim Sci*. 2006; 84: 1–10. PMID: [16361485](#)
33. Grinshpon M, Bondarenko VE. Simulation of the effects of moderate stimulation/inhibition of the  $\beta$ 1-adrenergic signaling system and its components in mouse ventricular myocytes. *Am J Physiol Cell Physiol*. 2016; <https://doi.org/10.1152/ajpcell.00002.2016> PMID: [26936457](#)
34. Semsarian C, Wu MJ, Ju YK, Marciniak T, Yeoh T, Allen DG, et al. Skeletal muscle hypertrophy is mediated by a Ca<sup>2+</sup>-dependent calcineurin signaling pathway. *Nature*. 1999; 400: 576–580. <https://doi.org/10.1038/23054> PMID: [10448861](#)
35. Hudson MB, Price SR. Calcineurin: A poorly understood regulator of muscle mass. *Int J Biochem Cell B*. 2013; 45: 2173–2178.
36. Wang YX, Zhang CL, Yu RT, Cho HK, Nelson MC, Bayuga-Ocampo CR, et al. Regulation of muscle fiber type and running endurance by PPAR $\delta$ . *PLoS Biol*. 2004; 2(10): e294. <https://doi.org/10.1371/journal.pbio.0020294> PMID: [15328533](#)
37. Coolican SA, Samuel DS, Ewton DZ, McWade FJ, Florini JR. The mitogenic and myogenic actions of insulin-like growth factors utilize distinct signaling pathways. *J Biol Chem*. 1997; 272: 6653–6662. PMID: [9045696](#)
38. Tureckova J, Wilson EM, Cappalonga JL, Rotwein P. Insulin-like growth factor-mediated muscle differentiation: collaboration between phosphatidylinositol 3-kinase-Akt-signaling pathways and myogenin. *J Biol Chem*. 2001; 276: 39264–39270. <https://doi.org/10.1074/jbc.M104991200> PMID: [11500504](#)
39. Takemori H, Katoh Hashimoto Y, Nakae J, Olson EN, Okamoto M. Inactivation of HDAC5 by SIK1 in AICAR-treated C2C12 myoblasts. *Endocr J*. 2009; 56(1): 121–130. PMID: [18946175](#)



40. Yu HY, Fujii N, Hirshman MF, Pomerleau JM, Goodyear LJ. Cloning and characterization of mouse 50-AMP-activated protein kinase gamma 3 subunit. *Am J Physiol—Cell Ph.* 2004; 286: C283–C292.
41. Wei H, Li Z, Wang X, Wang J, Pang W, Yang G, et al. microRNA-151-3p regulates slow muscle gene expression by targeting ATP2a2 in skeletal muscle cells. *J Cell Physiol.* 2015; 230(5): 1003–12. <https://doi.org/10.1002/jcp.24793> PMID: 25200835
42. Puigserver P, Wu Z, Park CW, Graves R. A cold-inducible coactivator of nuclear receptors linked to adaptive thermogenesis. *Cell.* 1993; 92: 829–839.
43. Isabel W, Frank S. Molecular mechanisms underlying the development of endothermy in birds (*Gallus gallus*): a new role of PGC-1 $\alpha$ ? *Am J Physiol Regulatory Integrative Comp Physiol.* 2007; 293: 2315–2322.
44. Serge S, Raphael T, Gesa S, Barbara M, Oliver B, Susan T, et al. Remodeling of calcium handling in skeletal muscle through PGC-1 $\alpha$  impact on force, fatigability, and fiber type. *Am J Physiol Cell Physiol.* 2012; 302: C88–C99. <https://doi.org/10.1152/ajpcell.00190.2011> PMID: 21918181
45. Kumar R, Singh SP, Mitra A. Short-hairpin Mediated Myostatin Knockdown Resulted in Altered Expression of Myogenic Regulatory Factors with Enhanced Myoblast Proliferation in Fetal Myoblast Cells of Goats. *Anim Biotechnol.* 2017; 30:1–9.
46. Tripathi AK, Apamathi MK, Patel AK, Joshi CG. In vitro silencing of myostatin gene by shRNAs in chicken embryonic myoblast cells. *Biotechnol Prog.* 2013; 29(2):425–31. <https://doi.org/10.1002/btpr.1681> PMID: 23292805
47. Olson EN, Williams RS. Remodeling muscles with calcineurin. *Bioassays.* 2000; 22: 510–519.
